# Supplementary material for: How to increase chlamydia testing in primary care: a qualitative exploration with young people and application of a meta-theoretical model
Source: PubMed Central journal article supplement (PMC7677464; doi:10.1136/sextrans-2019-054309), 2020-05-29
Supplement: sextrans-2019-054309supp002.pdf [file sextrans-2019-054309supp002.pdf]

## Supplementary File 2. Thematic overview and summary of all findings

| Barriers Themes and Subthemes            |                                  | COM-B Components         | Intervention Options |            |                            |           | Policy Categories       |                   |            |
|------------------------------------------|----------------------------------|--------------------------|----------------------|------------|----------------------------|-----------|-------------------------|-------------------|------------|
|                                          |                                  |                          | Education            | Persuasion | Environment. Restructuring | Modelling | Communicat. & Marketing | Service Provision | Guidelines |
| <b>Self-sampling</b>                     |                                  | Physical Capability      |                      |            |                            |           | ✓                       | ✓                 |            |
| <b>Lack of information and awareness</b> | Asymptomatic                     | Psychological Capability | ✓                    | ✓          |                            |           | ✓                       |                   |            |
|                                          | Risk of transmission             |                          | ✓                    | ✓          |                            |           | ✓                       |                   |            |
|                                          | Testing process                  |                          | ✓                    | ✓          |                            |           | ✓                       |                   |            |
|                                          | Ease of treatment                |                          | ✓                    | ✓          |                            |           | ✓                       |                   |            |
|                                          | Availability in general practice |                          | ✓                    | ✓          |                            |           | ✓                       |                   |            |
| <b>Testing not a priority</b>            |                                  |                          |                      | ✓          |                            | ✓         | ✓                       | ✓                 |            |
| <b>Perceived low risk</b>                | Sexual invincibility             | Reflective Motivation    | ✓                    | ✓          |                            |           | ✓                       |                   | ✓          |
|                                          | Relationship status (monogamy)   |                          | ✓                    | ✓          |                            |           | ✓                       |                   | ✓          |
|                                          | Belief chlamydia is not serious  |                          | ✓                    | ✓          |                            |           | ✓                       |                   | ✓          |
| <b>Embarrassment</b>                     | Knowing their GP                 | Automatic Motivation     |                      |            |                            |           |                         | ✓                 | ✓          |
|                                          | Being seen                       |                          |                      |            |                            |           |                         | ✓                 | ✓          |
|                                          | Procedure as invasive            |                          | ✓                    |            |                            |           | ✓                       | ✓                 |            |
|                                          | Having to take clothes off       |                          | ✓                    |            |                            |           | ✓                       | ✓                 |            |
| <b>Fear</b>                              | Long term consequence            | Automatic Motivation     |                      | ✓          |                            |           | ✓                       |                   |            |
|                                          | Expectations of stigma           |                          | ✓                    |            | ✓                          |           | ✓                       | ✓                 | ✓          |
|                                          | Unknown testing processes        |                          |                      | ✓          |                            |           | ✓                       |                   |            |
|                                          | Positive result                  |                          |                      | ✓          |                            |           |                         |                   |            |
| <b>Guilt</b>                             |                                  |                          |                      | ✓          |                            | ✓         |                         |                   |            |
| <b>UK primary care context</b>           | Strained system                  | Physical Opportunity     |                      |            | ✓                          |           |                         | ✓                 |            |
|                                          | Practice registration            |                          |                      |            | ✓                          |           |                         | ✓                 |            |
|                                          | Getting appointments             |                          |                      |            | ✓                          |           |                         | ✓                 |            |
|                                          | Lacks urgency                    |                          | ✓                    |            | ✓                          |           |                         | ✓                 |            |
|                                          | Time constraints                 |                          |                      |            | ✓                          |           |                         | ✓                 |            |
| <b>Location of toilet</b>                |                                  |                          |                      | ✓          |                            |           | ✓                       |                   |            |
| <b>Stigma</b>                            | Sex taboo                        | Social Opportunity       | ✓                    |            |                            | ✓         | ✓                       | ✓                 | ✓          |
|                                          | Presumed promiscuity             |                          | ✓                    |            |                            | ✓         | ✓                       | ✓                 | ✓          |
|                                          | Judgment from HCP                |                          | ✓                    |            |                            | ✓         | ✓                       | ✓                 | ✓          |
|                                          | Judgment from receptionists      |                          | ✓                    |            |                            | ✓         | ✓                       | ✓                 | ✓          |
|                                          | Younger age                      |                          | ✓                    |            |                            | ✓         | ✓                       | ✓                 | ✓          |
|                                          | Never tested                     |                          | ✓                    |            |                            | ✓         | ✓                       | ✓                 | ✓          |
|                                          | Sexual orientation               |                          | ✓                    |            |                            | ✓         | ✓                       | ✓                 | ✓          |

Note: COM-B = Capability, Opportunity, Motivation Model of Behaviour
