# Supplementary material for: How to increase chlamydia testing in primary care: a qualitative exploration with young people and application of a meta-theoretical model
Source: PubMed Central journal article supplement (PMC7677464; doi:10.1136/sextrans-2019-054309), 2020-05-29
Supplement: sextrans-2019-054309supp003.pdf [file sextrans-2019-054309supp003.pdf]

## GENERAL PRACTICE CHLAMYDIA TESTING FOR YOUNG PEOPLE

## Supplementary File 3

## Demographic characteristics of sample

| Demographic         |                                          | <i>n</i> | %     |
|---------------------|------------------------------------------|----------|-------|
| Ethnicity           | White British                            | 22       | 78.57 |
|                     | White Irish                              | 1        | 3.57  |
|                     | Any other White background               | 2        | 7.14  |
|                     | White and Black Caribbean                | 1        | 3.57  |
|                     | White and Black African                  | 1        | 3.57  |
|                     | White and Asian                          | 1        | 3.57  |
| Sexual orientation  | Heterosexual                             | 19       | 67.86 |
|                     | Gay or lesbian                           | 2        | 7.14  |
|                     | Bisexual                                 | 5        | 17.86 |
|                     | Pansexual                                | 2        | 7.14  |
| Education level     | GCSE                                     | 4        | 14.29 |
|                     | A Level                                  | 5        | 17.86 |
|                     | Certificate of higher education          | 3        | 10.71 |
|                     | Foundation degree                        | 2        | 7.14  |
|                     | Undergraduate degree                     | 12       | 42.86 |
|                     | Postgraduate degree                      | 2        | 7.14  |
| Occupational status | Full-time employed                       | 8        | 28.57 |
|                     | Part-time employed                       | 4        | 14.29 |
|                     | Full-time student                        | 11       | 39.29 |
|                     | Not in education, employment or training | 5        | 17.86 |
| Relationship status | Not dating anyone                        | 11       | 39.29 |
|                     | In an open relationship                  | 1        | 3.57  |
|                     | Dating one person exclusively            | 12       | 42.86 |
|                     | Living with romantic partner             | 3        | 10.71 |
|                     | Married                                  | 1        | 3.57  |
