# Supplementary material for: How to increase chlamydia testing in primary care: a qualitative exploration with young people and application of a meta-theoretical model
Source: PubMed Central journal article supplement (PMC7677464; doi:10.1136/sextrans-2019-054309), 2020-05-29
Supplement: sextrans-2019-054309supp004.pdf [file sextrans-2019-054309supp004.pdf]

## Web Appendix 2

### Additional references

- w1. Hobbs FR, Bankhead C, Mukhtar T, et al. Clinical workload in UK primary care: a retrospective analysis of 100 million consultations in England, 2007–14. *The Lancet* 2016;387(10035):2323-30. doi: 10.1016/S0140-6736(16)00620-6
- w2. Alberts A, Elkind D, Ginsberg S. The personal fable and risk-taking in early adolescence. *Journal of Youth and Adolescence* 2007;36(1):71-76.
- w3. Elkind D. Egocentrism in adolescence. *Child Development* 1967:1025-34.
- w4. Brookes G, Harvey K. Peddling a semiotics of fear: a critical examination of scare tactics and commercial strategies in public health promotion. *Journal of Social Semiotics* 2015;25(1):57-80. doi: 10.1080/10350330.2014.988920
- w5. Ruiter RA, Kessels LT, Peters GJY, et al. Sixty years of fear appeal research: Current state of the evidence. *International Journal of Psychology* 2014;49(2):63-70. doi: 10.1002/ijop.12042
- w6. Nadarzynski T, Burton J, Henderson K, et al. Targeted advertisement of chlamydia screening on social media: A mixed-methods analysis. *Digital Health* 2019;5:2055207619827193.
- w7. Office for National Statistics. Internet users, UK: 2018. ONS: UK 2018. Available from: <https://www.ons.gov.uk/businessindustryandtrade/itandinternetindustry/bulletins/internetusers/2018>
- w8. Bilardi JE, Sanci LA, Fairley CK, et al. The experience of providing young people attending general practice with an online risk assessment tool to assess their own sexual health risk. *BMC Infectious Diseases* 2009;9. doi: 10.1186/1471-2334-9-29
- w9. Booth AR, Norman P, Goyder E, et al. Pilot study of a brief intervention based on the theory of planned behaviour and self-identity to increase chlamydia testing among

- young people living in deprived areas. *British Journal of Health Psychology* 2014;19(3):636-51. doi: 10.1111/bjhp.12065
- w10. Gold J, Goller J, Hellard M, et al. Impact evaluation of a youth sexually transmissible infection awareness campaign using routinely collected data sources. *Sexual Health* 2011;8(2):234-41. doi: 10.1071/sh10082
- w11. Conner M, Norman P. Predicting and changing health behaviour: Research and practice with social cognition models. 3rd ed. England: Open University Press 2015.
- w12. Conner M, Norman P. Health behaviour: Current issues and challenges. *Psychology & Health* 2017;32(8):895-906. doi: 10.1080/08870446.2017.1336240
- w13. Ogden J. Celebrating variability and a call to limit systematisation: The example of the Behaviour Change Technique Taxonomy and the Behaviour Change Wheel. *Health Psychology Review* 2016;10(3):245-50. doi: 10.1080/17437199.2016.1190291
- w14. Guy RJ, Ali H, Liu B, et al. Genital chlamydia infection in young people: A review of the evidence. Australia: The Kirby Institute, University of New South Wales 2011. Available from: Available from: <https://www.acon.org.au/wp-content/uploads/2015/04/Genital-Chlamydia-Review-KIRBY-2011.pdf>
- w15. Knoll LJ, Magis-Weinberg L, Speekenbrink M, et al. Social influence on risk perception during adolescence. *Psychological Science* 2015;26(5):583-92. doi: 10.1177/0956797615569578
- w16. Sales JM, Irwin CE. Theories of adolescent risk-taking: A biopsychosocial model. In: O'Donohue W., Benuto L., Woodward Tolle L., eds. *Handbook of Adolescent Health Risk Behavior*. San Francisco, CA: Springer 2009:13-29.
- w17. McDonagh LK, Blomquist P, Wayal S, et al. Collaborative and consultative patient and public involvement in sexual health research: Lessons learnt from four case studies.

- Sexually Transmitted Infections* 2020;96(2):96-100. doi: 10.1136/sextrans-2018-053922
- w18. McDonagh LK, Saunders JM, Cassell J, et al. Facilitators and barriers to chlamydia testing in general practice for young people using a theoretical model (COM-B): a systematic review protocol. *BMJ Open* 2017;7(3):e013588. doi: 10.1080/00224499.2017.1410519
- w19. National Health Service England. Sexual Monitoring: Full Specification. NHS: London 2017. Available from: <https://www.england.nhs.uk/publication/sexual-orientation-monitoring-full-specification/>
- w20. Jetten J, Haslam SA, Cruwys T, et al. Advancing the social identity approach to health and well-being: Progressing the social cure research agenda. *European Journal of Social Psychology* 2017;47(7):789-802. doi: 10.1002/ejsp.2333
- w21. Smith JR, Louis WR, Tarrant M. University students' social identity and health behaviours. In: Mavor K., Platow M., Bizumic B, eds. Self and social identity in educational contexts. New York: Psychology Press 2017:159-75.
